# Supplementary material
Source: publisher figshare collection journal article supplement (https://acs.figshare.com/ndownloader/files/4681504)
Supplement: Supplementary file 1 [file 4681504]

 
data_ma55-2t 
 
_audit_creation_method            SHELXL-97 
_chemical_name_systematic 
; 
 ? 
; 
_chemical_name_common             ? 
_chemical_melting_point           ? 
_chemical_formula_moiety          ? 
_chemical_formula_sum 
 'C12 H9 In O6' 
_chemical_formula_weight          364.01 
 
loop_ 
 _atom_type_symbol 
 _atom_type_description 
 _atom_type_scat_dispersion_real 
 _atom_type_scat_dispersion_imag 
 _atom_type_scat_source 
 'C'  'C'   0.0033   0.0016 
 'International Tables Vol C Tables 4.2.6.8 and 6.1.1.4' 
 'In'  'In'  -0.7276   1.3100 
 'International Tables Vol C Tables 4.2.6.8 and 6.1.1.4' 
 'O'  'O'   0.0106   0.0060 
 'International Tables Vol C Tables 4.2.6.8 and 6.1.1.4' 
 'H'  'H'   0.0000   0.0000 
 'International Tables Vol C Tables 4.2.6.8 and 6.1.1.4' 
 
_symmetry_cell_setting            ? 
_symmetry_space_group_name_H-M    Pnma 
 
loop_ 
 _symmetry_equiv_pos_as_xyz 
 'x, y, z' 
 '-x+1/2, -y, z+1/2' 
 'x+1/2, -y+1/2, -z+1/2' 
 '-x, y+1/2, -z' 
 '-x, -y, -z' 
 'x-1/2, y, -z-1/2' 
 '-x-1/2, y-1/2, z-1/2' 
 'x, -y-1/2, z' 
 
_cell_length_a                    7.8360(6) 
_cell_length_b                    25.4564(19) 
_cell_length_c                    5.7985(4) 
_cell_angle_alpha                 90.00 
_cell_angle_beta                  90.00 
_cell_angle_gamma                 90.00 
_cell_volume                      1156.66(15) 
_cell_formula_units_Z             4 
_cell_measurement_temperature     293 
_cell_measurement_reflns_used     ? 
_cell_measurement_theta_min       ? 
_cell_measurement_theta_max       ? 
 
_exptl_crystal_description        prism 
_exptl_crystal_colour             colorless 
_exptl_crystal_size_max           0.325 
_exptl_crystal_size_mid           0.175 
_exptl_crystal_size_min           0.150 
_exptl_crystal_density_meas       ? 
_exptl_crystal_density_diffrn     2.090 
_exptl_crystal_density_method     'not measured' 
_exptl_crystal_F_000              712 
_exptl_absorpt_coefficient_mu     2.064 
_exptl_absorpt_correction_type    multi-scan 
_exptl_absorpt_correction_T_min   0.66 
_exptl_absorpt_correction_T_max   0.74 
_exptl_absorpt_process_details    SADABS 
 
_exptl_special_details 
; 
 ? 
; 
 
_diffrn_ambient_temperature       293 
_diffrn_radiation_wavelength      0.71073 
_diffrn_radiation_type            MoK\a 
_diffrn_radiation_source          'fine-focus sealed tube' 
_diffrn_radiation_monochromator   graphite 
_diffrn_measurement_device_type   ? 
_diffrn_measurement_method        ? 
_diffrn_detector_area_resol_mean  ? 
_diffrn_standards_number          ? 
_diffrn_standards_interval_count  ? 
_diffrn_standards_interval_time   ? 
_diffrn_standards_decay_%         ? 
_diffrn_reflns_number             6758 
_diffrn_reflns_av_R_equivalents   0.0386 
_diffrn_reflns_av_sigmaI/netI     0.0213 
_diffrn_reflns_limit_h_min        -8 
_diffrn_reflns_limit_h_max        10 
_diffrn_reflns_limit_k_min        -32 
_diffrn_reflns_limit_k_max        18 
_diffrn_reflns_limit_l_min        -7 
_diffrn_reflns_limit_l_max        7 
_diffrn_reflns_theta_min          3.20 
_diffrn_reflns_theta_max          27.48 
_reflns_number_total              1343 
_reflns_number_gt                 1250 
_reflns_threshold_expression      >2sigma(I) 
 
_computing_data_collection        ? 
_computing_cell_refinement        ? 
_computing_data_reduction         ? 
_computing_structure_solution     'SHELXS-97 (Sheldrick, 1990)' 
_computing_structure_refinement   'SHELXL-97 (Sheldrick, 1997)' 
_computing_molecular_graphics     ? 
_computing_publication_material   ? 
 
_refine_special_details 
; 
 Refinement of F^2^ against ALL reflections.  The weighted R-factor wR and 
 goodness of fit S are based on F^2^, conventional R-factors R are based 
 on F, with F set to zero for negative F^2^. The threshold expression of 
 F^2^ > 2sigma(F^2^) is used only for calculating R-factors(gt) etc. and is 
 not relevant to the choice of reflections for refinement.  R-factors based 
 on F^2^ are statistically about twice as large as those based on F, and R- 
 factors based on ALL data will be even larger. 
; 
 
_refine_ls_structure_factor_coef  Fsqd  
_refine_ls_matrix_type            full 
_refine_ls_weighting_scheme       calc  
_refine_ls_weighting_details 
 'calc w=1/[\s^2^(Fo^2^)+(0.0246P)^2^+2.2970P] where P=(Fo^2^+2Fc^2^)/3' 
_atom_sites_solution_primary      direct 
_atom_sites_solution_secondary    difmap 
_atom_sites_solution_hydrogens    geom 
_refine_ls_hydrogen_treatment     mixed 
_refine_ls_extinction_method      none 
_refine_ls_extinction_coef        ? 
_refine_ls_number_reflns          1343 
_refine_ls_number_parameters      98 
_refine_ls_number_restraints      1 
_refine_ls_R_factor_all           0.0290 
_refine_ls_R_factor_gt            0.0273 
_refine_ls_wR_factor_ref          0.0675 
_refine_ls_wR_factor_gt           0.0667 
_refine_ls_goodness_of_fit_ref    1.207 
_refine_ls_restrained_S_all       1.207 
_refine_ls_shift/su_max           0.001 
_refine_ls_shift/su_mean          0.000 
 
loop_ 
 _atom_site_label 
 _atom_site_type_symbol 
 _atom_site_fract_x 
 _atom_site_fract_y 
 _atom_site_fract_z 
 _atom_site_U_iso_or_equiv 
 _atom_site_adp_type 
 _atom_site_occupancy 
 _atom_site_symmetry_multiplicity 
 _atom_site_calc_flag 
 _atom_site_refinement_flags 
 _atom_site_disorder_assembly 
 _atom_site_disorder_group 
In1 In 0.09499(4) 0.2500 0.74357(4) 0.01862(11) Uani 1 2 d S . . 
O1 O 0.1058(3) 0.16291(9) 0.6828(5) 0.0341(5) Uani 1 1 d . . . 
O2 O 0.0280(3) 0.19131(8) 1.0229(4) 0.0305(5) Uani 1 1 d . . . 
O3 O 0.3430(3) 0.2500 0.8714(6) 0.0247(6) Uani 1 2 d SD . . 
O4 O 0.1732(5) 0.2500 0.3837(6) 0.0367(8) Uani 1 2 d S . . 
C1 C 0.0553(4) 0.15345(11) 0.8858(5) 0.0241(6) Uani 1 1 d . . . 
C2 C 0.0232(4) 0.09835(11) 0.9622(5) 0.0243(6) Uani 1 1 d . . . 
C3 C -0.0554(4) 0.08914(12) 1.1783(6) 0.0298(7) Uani 1 1 d . . . 
H1 H -0.0856 0.1172 1.2723 0.036 Uiso 1 1 calc R . . 
C4 C -0.0868(4) 0.03861(13) 1.2486(5) 0.0300(7) Uani 1 1 d . . . 
H2 H -0.1392 0.0327 1.3901 0.036 Uiso 1 1 calc R . . 
C5 C -0.0403(4) -0.00474(10) 1.1081(5) 0.0229(6) Uani 1 1 d . . . 
C6 C 0.0707(4) 0.05738(11) 0.8224(5) 0.0241(6) Uani 1 1 d . . . 
H3 H 0.1231 0.0641 0.6816 0.029 Uiso 1 1 calc R . . 
H4 H 0.144(8) 0.276(3) 0.306(11) 0.09(2) Uiso 1 1 d . . . 
H5 H 0.349(11) 0.2500 1.011(2) 0.11(4) Uiso 1 2 d SD . . 
 
loop_ 
 _atom_site_aniso_label 
 _atom_site_aniso_U_11 
 _atom_site_aniso_U_22 
 _atom_site_aniso_U_33 
 _atom_site_aniso_U_23 
 _atom_site_aniso_U_13 
 _atom_site_aniso_U_12 
In1 0.02151(18) 0.01130(15) 0.02304(17) 0.000 0.00028(10) 0.000 
O1 0.0553(15) 0.0155(10) 0.0316(11) 0.0017(9) 0.0069(11) -0.0017(10) 
O2 0.0452(13) 0.0137(9) 0.0325(11) -0.0001(8) 0.0014(10) -0.0025(9) 
O3 0.0131(12) 0.0330(17) 0.0280(17) 0.000 0.0003(11) 0.000 
O4 0.059(2) 0.0285(18) 0.0231(16) 0.000 0.0053(15) 0.000 
C1 0.0250(13) 0.0150(12) 0.0323(15) 0.0026(11) -0.0024(12) -0.0008(11) 
C2 0.0285(14) 0.0147(12) 0.0298(14) 0.0029(10) -0.0027(12) -0.0021(11) 
C3 0.0420(18) 0.0153(13) 0.0319(15) -0.0023(11) 0.0049(14) 0.0006(13) 
C4 0.041(2) 0.0206(15) 0.0285(16) 0.0003(11) 0.0086(13) -0.0022(13) 
C5 0.0283(14) 0.0145(12) 0.0258(14) 0.0003(10) 0.0002(12) -0.0007(11) 
C6 0.0286(15) 0.0177(13) 0.0260(13) 0.0026(11) 0.0014(12) -0.0026(11) 
 
_geom_special_details 
; 
 All esds (except the esd in the dihedral angle between two l.s. planes) 
 are estimated using the full covariance matrix.  The cell esds are taken 
 into account individually in the estimation of esds in distances, angles 
 and torsion angles; correlations between esds in cell parameters are only 
 used when they are defined by crystal symmetry.  An approximate (isotropic) 
 treatment of cell esds is used for estimating esds involving l.s. planes. 
; 
 
loop_ 
 _geom_bond_atom_site_label_1 
 _geom_bond_atom_site_label_2 
 _geom_bond_distance 
 _geom_bond_site_symmetry_2 
 _geom_bond_publ_flag 
In1 O3 2.080(3) . ? 
In1 O3 2.084(3) 6_557 ? 
In1 O4 2.175(3) . ? 
In1 O1 2.246(2) . ? 
In1 O1 2.247(2) 8_565 ? 
In1 O2 2.265(2) . ? 
In1 O2 2.265(2) 8_565 ? 
In1 C1 2.611(3) 8_565 ? 
In1 C1 2.611(3) . ? 
O1 C1 1.265(4) . ? 
O2 C1 1.267(4) . ? 
O3 In1 2.084(3) 6_657 ? 
C1 C2 1.492(4) . ? 
C2 C6 1.372(4) . ? 
C2 C3 1.416(4) . ? 
C3 C4 1.372(4) . ? 
C4 C5 1.419(4) . ? 
C5 C6 1.419(4) 5_557 ? 
C5 C5 1.424(6) 5_557 ? 
C6 C5 1.419(4) 5_557 ? 
 
loop_ 
 _geom_angle_atom_site_label_1 
 _geom_angle_atom_site_label_2 
 _geom_angle_atom_site_label_3 
 _geom_angle 
 _geom_angle_site_symmetry_1 
 _geom_angle_site_symmetry_3 
 _geom_angle_publ_flag 
O3 In1 O3 177.78(5) . 6_557 ? 
O3 In1 O4 94.51(14) . . ? 
O3 In1 O4 87.71(14) 6_557 . ? 
O3 In1 O1 91.18(7) . . ? 
O3 In1 O1 89.18(7) 6_557 . ? 
O4 In1 O1 80.72(7) . . ? 
O3 In1 O1 91.18(7) . 8_565 ? 
O3 In1 O1 89.18(7) 6_557 8_565 ? 
O4 In1 O1 80.73(7) . 8_565 ? 
O1 In1 O1 161.43(13) . 8_565 ? 
O3 In1 O2 87.80(9) . . ? 
O3 In1 O2 90.53(9) 6_557 . ? 
O4 In1 O2 138.71(5) . . ? 
O1 In1 O2 58.00(8) . . ? 
O1 In1 O2 140.52(8) 8_565 . ? 
O3 In1 O2 87.80(9) . 8_565 ? 
O3 In1 O2 90.53(9) 6_557 8_565 ? 
O4 In1 O2 138.71(5) . 8_565 ? 
O1 In1 O2 140.52(8) . 8_565 ? 
O1 In1 O2 58.00(8) 8_565 8_565 ? 
O2 In1 O2 82.53(11) . 8_565 ? 
O3 In1 C1 89.92(7) . 8_565 ? 
O3 In1 C1 89.33(7) 6_557 8_565 ? 
O4 In1 C1 109.68(7) . 8_565 ? 
O1 In1 C1 169.42(9) . 8_565 ? 
O1 In1 C1 28.97(10) 8_565 8_565 ? 
O2 In1 C1 111.55(9) . 8_565 ? 
O2 In1 C1 29.03(9) 8_565 8_565 ? 
O3 In1 C1 89.92(7) . . ? 
O3 In1 C1 89.33(7) 6_557 . ? 
O4 In1 C1 109.68(7) . . ? 
O1 In1 C1 28.97(10) . . ? 
O1 In1 C1 169.42(9) 8_565 . ? 
O2 In1 C1 29.03(9) . . ? 
O2 In1 C1 111.55(9) 8_565 . ? 
C1 In1 C1 140.53(14) 8_565 . ? 
C1 O1 In1 91.72(18) . . ? 
C1 O2 In1 90.79(18) . . ? 
In1 O3 In1 140.46(17) . 6_657 ? 
O1 C1 O2 119.5(3) . . ? 
O1 C1 C2 120.5(3) . . ? 
O2 C1 C2 120.0(3) . . ? 
O1 C1 In1 59.31(15) . . ? 
O2 C1 In1 60.17(14) . . ? 
C2 C1 In1 177.0(2) . . ? 
C6 C2 C3 121.0(3) . . ? 
C6 C2 C1 119.6(3) . . ? 
C3 C2 C1 119.4(3) . . ? 
C4 C3 C2 119.7(3) . . ? 
C3 C4 C5 120.8(3) . . ? 
C4 C5 C6 121.9(3) . 5_557 ? 
C4 C5 C5 119.1(3) . 5_557 ? 
C6 C5 C5 119.0(3) 5_557 5_557 ? 
C2 C6 C5 120.3(3) . 5_557 ? 
 
_diffrn_measured_fraction_theta_max    0.986 
_diffrn_reflns_theta_full              27.48 
_diffrn_measured_fraction_theta_full   0.986 
_refine_diff_density_max    0.519 
_refine_diff_density_min   -1.533 
_refine_diff_density_rms    0.121 
